# Supplementary material for: Detection of Volatile Compounds and Their Contribution to the Nutritional Quality of Chinese and Japanese Welsh Onions (Allium fistulosum L.)
Source: MDPI journal article supplement (doi:10.3390/horticulturae10050446), 2024-04-26
Supplement: s1 [file s1]

**Supplemental Data:****Table S1** Relative content of flavor compounds (%) in different Zhangqiu and Tenko organs. The data are from three replicated experiments (n=3) representing means± SD. —: not detectable.

| Volatile compounds                         | Codes | Z-Root     | Z-Pseudostem | Z-Leaf     | T-Root     | T-Pseudostem | T-Leaf     |
|--------------------------------------------|-------|------------|--------------|------------|------------|--------------|------------|
| Propionaldehyde                            | X01   | 1.17±0.31  | 0.65±0.05    | 4.33±0.5   | 0.91±0.24  | 1.24±0.2     | 2.31±0.49  |
| Carbon disulfide                           | X02   | 1.37±0.11  | —            | 2.18±0.37  | 0.67±0.03  | 0.93±0.28    | 3.58±0.46  |
| Propylene sulfide                          | X03   | 1.06±0.13  | 0.55±0.25    | —          | 0.35±0.02  | 0.72±0.05    | —          |
| Allyl mercaptan                            | X04   | —          | 0.86±0.11    | —          | 0.59±0.03  | 1.45±0.06    | —          |
| 1-Sulfinylpropane                          | X06   | —          | 0.6±0.56     | —          | —          | 1.86±0.25    | 6.69±1.27  |
| Hexanal                                    | X07   | 9.98±1.49  | —            | 1.88±0.23  | 19.67±1.41 | 0.79±0.25    | 2.02±0.47  |
| 2-Methyl-2-pentenal                        | X08   | 12.26±0.93 | 10.32±5.33   | 44.58±9.52 | 15.59±0.94 | 9.85±4.19    | 19.63±5.39 |
| (E)-2-Hexenal                              | X09   | 1.87±0.23  | —            | 3.43±0.89  | 3.08±0.28  | —            | 1.47±0.31  |
| Ethylbenzene                               | X10   | —          | 0.13±0.01    | —          | —          | —            | 1.53±0.11  |
| m-Xylene                                   | X11   | —          | 0.9±0.19     | —          | —          | —            | 4.93±0.41  |
| o-Xylene                                   | X12   | —          | 0.2±0.07     | 1.96±0.41  | —          | 0.8±0.15     | 1.07±0.1   |
| 3,4-Dimethyl-thiophene                     | X13   | 1.51±0.03  | 1.95±1.55    | 10.79±3.81 | 1.17±0.07  | 0.67±0.41    | 5.78±0.85  |
| 2,4-Dimethyl-thiophene                     | X14   | —          | —            | —          | —          | 4.58±1.35    | —          |
| (E)-2-Hexenol                              | X15   | —          | —            | —          | 1.05±0.13  | —            | —          |
| Methoxy-phenyl-Oxime                       | X16   | —          | 0.29±0.06    | —          | —          | —            | —          |
| Methyl propyl disulfide                    | X17   | 4.28±0.45  | 2.31±0.44    | —          | 0.82±0.17  | 1.59±0.22    | —          |
| (E)-Methyl-2-propenyl disulfane            | X18   | 2.22±0.06  | 2.91±0.3     | —          | 0.6±0.08   | 1.07±0.42    | —          |
| 4-Ethyl-1-octyn-3-ol                       | X19   | —          | 0.44±0.04    | —          | —          | —            | —          |
| 2-Ethyl-1-Hexanol                          | X20   | 0.19±0.05  | —            | —          | 0.57±0.09  | —            | —          |
| Dimethyl silanediol                        | X05   | —          | 1.53±0.6     | 4.85±0.54  | 1.37±0.18  | 1.52±0.42    | 4.06±1.34  |
| 1,8-Cineole                                | X21   | —          | 0.24±0.03    | —          | —          | —            | —          |
| 6-Amino-6-oxo-hexanoic acid                | X22   | 0.28±0.02  | —            | —          | —          | —            | —          |
| 1-Nonen-4-ol                               | X23   | 0.21±0.1   | —            | —          | —          | —            | —          |
| 5-Methyl-2-methylamino-2-thiazoline        | X24   | —          | 0.11±0.02    | —          | —          | —            | —          |
| 1-Nonanal                                  | X25   | —          | 0.16±0.13    | 0.62±0.04  | —          | 0.27±0.04    | 1±0.1      |
| Dipropyl disulfide                         | X26   | 34.9±1.21  | 21.8±7.22    | 4.46±0.97  | 29.06±1.8  | 19.75±4.98   | 7.42±2.96  |
| (E)-Propenyl-2-propyl disulfane            | X27   | 14.39±0.68 | 28.77±6.41   | 4.31±0.41  | 17.96±1.55 | 33.24±2.52   | 24.51±6.39 |
| 1-Allyl-3-(2-(allylthio)propyl) trisulfane | X28   | 0.65±0.05  | —            | —          | —          | —            | —          |
| 1,2-Di((E)-propenyl) disulfane             | X29   | 0.35±0.06  | 0.51±0.16    | —          | —          | 0.67±0.05    | —          |
| (E, Z)-Di-1-propenyl disulfide             | X30   | —          | 1.15±0.81    | —          | —          | 0.97±0.07    | —          |
| Methyl propyl trisulfide                   | X31   | 0.91±0.03  | 1.82±1.04    | —          | —          | 0.28±0.13    | —          |
| 4-Methyl-1,2,3-trithiolane                 | X32   | 0.21±0.01  | —            | —          | —          | —            | —          |
| (E)-Propenyl propanedithioate              | X33   | —          | 0.94±0.17    | —          | —          | 0.5±0.16     | —          |
| (E)-Methyl propenyl trisulfide             | X34   | 0.37±0.05  | 0.57±0.1     | —          | —          | —            | —          |
| (Z)-Methyl propenyl trisulfide             | X35   | 0.51±0.05  | 0.56±0.25    | —          | —          | —            | —          |

**Table S1** continued.

| Volatile compounds                           | Codes | Z-Root    | Z-Pseudostem | Z-Leaf    | T-Root    | T-Pseudostem | T-Leaf    |
|----------------------------------------------|-------|-----------|--------------|-----------|-----------|--------------|-----------|
| 2-Methoxy-3-sec-butyl pyrazine               | X36   | 0.77±0.1  | 0.48±0.05    | —         | 0.56±0.04 | 0.85±0.09    | 1.32±0.27 |
| 2-Mercapto-3,4-dimethyl-2,3-dihydrothiophene | X37   | 2.65±0.38 | 8.87±2.45    | 5.31±1.25 | 1.78±0.13 | 8.57±1.26    | 7.48±1.08 |
| 2-Undecanone                                 | X38   | —         | —            | 0.95±0.15 | —         | 0.55±0.05    | —         |
| Decyl aldehyde                               | X39   | —         | 0.18±0.01    | —         | —         | —            | —         |
| Dipropyl trisulfide                          | X40   | 3.14±0.33 | 5±1.24       | —         | 1.67±0.13 | 3.34±1.06    | 0.74±0.03 |
| (Z)-1-Propenyl propyl trisulfide             | X41   | 0.45±0.05 | 0.41±0.39    | —         | —         | 0.32±0.12    | —         |
| (E)-1-propenyl propyl trisulfide             | X42   | 1.99±0.32 | 3.78±1.37    | —         | 0.97±0.03 | 3.42±0.54    | —         |
| 2-Hexyl-5-methyl-3(2H)-furanone              | X43   | —         | 0.51±0.12    | —         | —         | —            | —         |
| Dibenzofuran                                 | X44   | 0.61±0.11 | 0.65±0.1     | 2.58±0.02 | 0.73±0.05 | 0.47±0.03    | 1.52±0.01 |
| Methyl 1-(propylthio)propyl disulfide        | X45   | 0.22±0.05 | —            | —         | —         | —            | —         |
| Methyl 1-(1-propenylthio) propyl disulfide   | X46   | 0.51±0.11 | 0.43±0.39    | —         | —         | —            | —         |
| 5-Methyl-2-octyl-3(2H)-furanone              | X47   | —         | 0.23±0.09    | —         | —         | —            | —         |
| 3,4-Dimethyl-2-(propyl disulfanyl) thiophene | X48   | —         | 0.19±0.07    | —         | —         | —            | —         |
| 3-Isopropyl-4-methyl-1-decen-4-ol            | X49   | —         | 0.33±0.23    | —         | —         | —            | —         |
| 2-Ethyl-1-decanol                            | X50   | 0.13±0.01 | —            | —         | —         | —            | —         |
| 1-Hexanol                                    | X51   | 1.05±0.07 | —            | —         | 1.24±0.07 | —            | —         |
| trans-Z-, alpha. -Bis-abolene epoxide        | X52   | —         | —            | —         | —         | —            | 0.77±0.12 |
| 3,7,11,15-Tetramethyl- 2-hexadecen-1-ol      | X53   | —         | —            | 0.9±0.22  | —         | —            | —         |
| 3,7-Dimethyl-1,3,6-octatriene                | X54   | —         | —            | 2.38±0.35 | —         | —            | —         |
| Linalool                                     | X55   | —         | —            | 6.89±0.45 | —         | —            | —         |
| Farnesene                                    | X56   | —         | —            | 3.43±0.41 | —         | —            | —         |
| Toluene                                      | X57   | —         | —            | —         | —         | —            | 1.02±0.08 |

**Table S2** The classes of volatile compounds in three organs of ‘Zhangqiu’ and ‘Tenko’. The data are from three replicated experiments (n=3) and represented as means± SD. –: not detectable. Different letters indicate significant differences between the same organ of two cultivars.

| Organs     | Cultivars | Classes of volatile compounds (%) |              |              |             |                  |             |              |
|------------|-----------|-----------------------------------|--------------|--------------|-------------|------------------|-------------|--------------|
|            |           | Alcohols                          | Aldehydes    | Hydrocarbons | Ketones     | Sulfur compounds | Pyrazines   | Others       |
| Root       | Zhangqiu  | 1.58±0.19bB                       | 25.28±2.52bB | —            | —           | 71.68±2.58aA     | 0.77±0.1aA  | 0.89±0.1bA   |
|            | Tenko     | 2.86±0.18aA                       | 39.25±2.45aA | —            | —           | 55.64±3.42bB     | 0.56±0.04aA | 2.1±0.2aA    |
| Pseudostem | Zhangqiu  | 1±0.22aA                          | 11.3±5.48aA  | 0.2±0.07bB   | —           | 83.97±5.21aA     | 0.48±0.05bA | 4.03±0.82aA  |
|            | Tenko     | —                                 | 12.15±4.25aA | 0.8±0.15aA   | —           | 83.93±5.05aA     | 0.85±0.09aA | 1.99±0.41aA  |
| Leaf       | Zhangqiu  | 7.79±0.28aA                       | 54.83±8.81aA | 7.76±0.74aA  | 0.95±0.15aA | 27.04±5.87bA     | —           | 7.43±0.52bA  |
|            | Tenko     | —                                 | 26.43±6.15bA | 1.07±0.1bB   | 0.55±0.05aA | 56.2±9.56aA      | 1.32±0.27aA | 13.83±1.45aA |

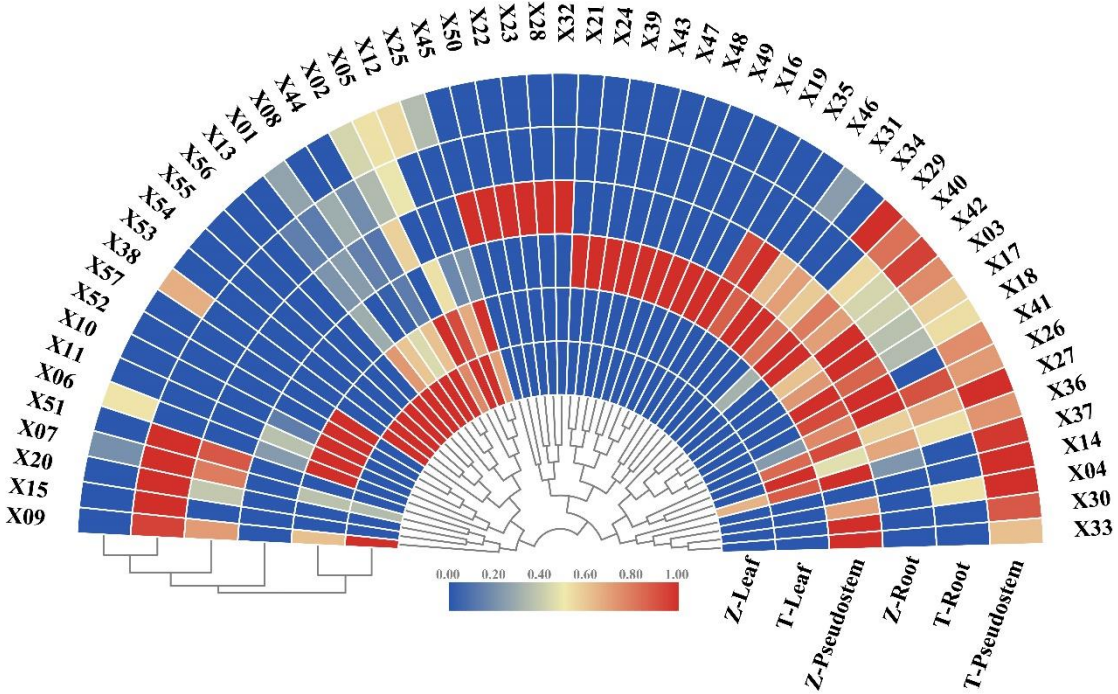

**Figure S1.** Volatile compound contents extracted from three organs of ‘Zhangqiu’ and ‘Tenko’. The letter ‘Z’ represents ‘Zhangqiu’, and ‘T’ represents ‘Tenko’. The compound numbering is the same as the data provided in Table S1.
